# Supplementary material
Source: publisher figshare collection journal article supplement (https://sage.figshare.com/ndownloader/files/12370610)
Supplement: Supplementary file 1 [file 12370610]

Appendix 2: Sensitivity analysis.

|  | Safety Risk | | Patient Handoff | | |
| --- | --- | --- | --- | --- | --- |
|  |  | |  |  | |
|  | Total Responses | Proportion Reporting Safety Risks N (%) | Total Responses | | Proportion Reporting Ineffective Handoff N (%) |
|  |  |  |  | |  |
| **Overall** | **115** | **38 (33%)** | **114** | | **34 (29%)** |
|  |  |  |  | |  |
| ED | 68 | 15 (31%) | 68 | | 17 (25%) |
| NICU | 47 | 23 (34%) | 46 | | 17 (37%) |
|  |  |  |  | |  |
| Nurse | 39 | 17 (44%) | 39 | | 13 (33%) |
| Physician/APP | 76 | 21 (28%) | 75 | | 21 (28%) |
|  |  |  |  | |  |

APP, advanced practice provider; ED, emergency department; NICU, neurosciences intensive care unit.
